# Supplementary material
Source: Springer Nature journal article supplement (https://www.springermedizin.de/resource/supplementary/13054_2010_8594_MOESM2_ESM.pdf/9732322)

# Upper lobe

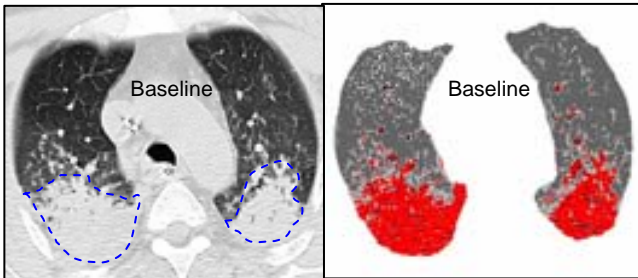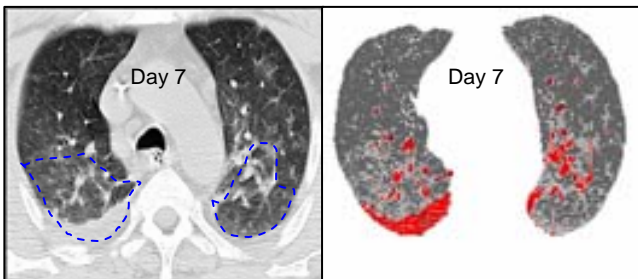

# Lower lobe

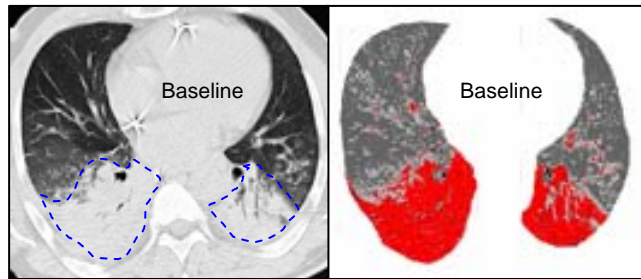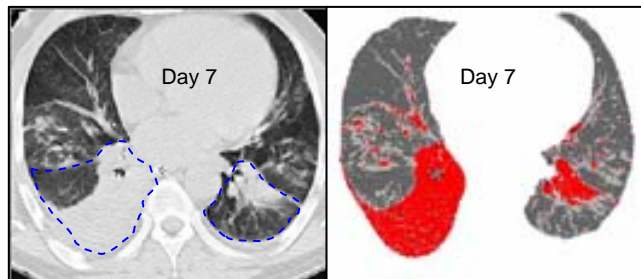

Supplement: MOESM2 [file 9732322]
